# Supplementary material for: Volatile Profiles of Emissions from Different Activities Analyzed Using Canister Samplers and Gas Chromatography-Mass Spectrometry (GC/MS) Analysis: A Case Study
Source: PubMed Central journal article supplement (PMC5334749; doi:10.3390/ijerph14020195), 2017-02-15
Supplement: ijerph-14-00195-s001.pdf [file ijerph-14-00195-s001.pdf]

# **Supplementary Materials: Volatile Profiles of Emissions from Different Activities Analyzed Using Canister Samplers and Gas Chromatography-Mass Spectrometry (GC/MS) Analysis: A Case Study**

**Santino Orecchio, Michele Fiore, Salvatore Barreca and Gabriele Vara**

| id | Compound                       | id | Compound                    | id  | Compound                     | id  | Compound                                |
|----|--------------------------------|----|-----------------------------|-----|------------------------------|-----|-----------------------------------------|
| 1  | 1-Propene                      | 47 | 1-Propanol                  | 93  | Butyl acetate                | 139 | $\alpha$ -Methylstyrene                 |
| 2  | Propane                        | 48 | 2-Butene, 2,3-dimethyl      | 94  | 1-Octene                     | 140 | 2-Methylstyrene                         |
| 3  | 1-Propyne                      | 49 | 3-Methylcyclopentene        | 95  | Octane                       | 141 | Benzaldehyde                            |
| 4  | Dichlorodifluoromethane        | 50 | 2-Methylfuran               | 96  | 2-Acetylfuran                | 142 | 3-Methylstyrene                         |
| 5  | 1,2-Propadiene                 | 51 | Butanal                     | 97  | Hexamethylcyclotrisiloxane   | 143 | $\delta$ -3-Carene                      |
| 6  | Methyl chloride                | 52 | 2,3-Butanedione             | 98  | Spiro[2,4]Hepta-4,6-Diene    | 144 | $\alpha$ -Terpinene                     |
| 7  | 1-Butene                       | 53 | Nitromethane                | 99  | Butyl acetate                | 145 | Benzofuran                              |
| 8  | 1,3-Butadiene                  | 54 | 2-Butanone                  | 100 | N-ethyl-1,3-dithioisindoline | 146 | Limone                                  |
| 9  | 1-Propene- 2 methyl /isobutene | 55 | 3-Buten-2-one               | 101 | Tetrachloroethylene          | 147 | 4-Methylstyrene                         |
| 10 | 1-Butyne                       | 56 | 3-Methyl-1,3-pentadiene     | 102 | 2-Hexanone                   | 148 | p-Cymene                                |
| 11 | Acetaldehyde                   | 57 | (Z) 2-Methyl-1,3-pentadiene | 103 | Hexanal                      | 149 | 1,3,5-Trimethylbenzene                  |
| 12 | Butane                         | 58 | Methylcyclopentadiene       | 104 | 2,4-Dimethyl-1-heptene       | 150 | 1,2,3-Trimethylbenzene                  |
| 13 | Methylcyclopropane             | 59 | 2,4-Dimethyl 1,4-pentadiene | 105 | Chlorobenzene-D5             | 151 | Benzene, 3-butenvyl                     |
| 14 | Isopentane                     | 60 | Ethyl Acetate               | 106 | 1,3-Cyclooctadiene           | 152 | Butylbenzene                            |
| 15 | Ethylcyclopropane              | 61 | Bromochloromethane          | 107 | Ethylbenzene                 | 153 | 3-Methyldecane                          |
| 16 | Methane, fluorotrichloro       | 62 | 2-Methylhexane              | 108 | 1-Nonene                     | 154 | $\gamma$ -Terpinene                     |
| 17 | 1-Pentene                      | 63 | Cyclohexane                 | 109 | m,p- Xylene                  | 155 | 1,2-Diethylbenzene                      |
| 18 | Pentane                        | 64 | Carbon Tetrachloride        | 110 | Phenylacetvlene              | 156 | Undecane                                |
| 19 | 1,2-Butadiene                  | 65 | 2-Methyl-1-propanol         | 111 | Nonane                       | 157 | Benzyl chloride                         |
| 20 | Ethanol                        | 66 | 3-Methylhexane              | 112 | Styrene                      | 158 | 1,2-Dichlorobenzene                     |
| 21 | Cyclobutane, methylene         | 67 | Benzene                     | 113 | 1,3,5,7-Cyclooctatetraene    | 159 | 1-Undecene                              |
| 22 | Furan                          | 68 | Cyclohexene                 | 114 | 2,6-Dimethyloctane           | 160 | 1-Propenylbenzene                       |
| 23 | 2-Methyl-1-butene              | 69 | 1-Heptene                   | 115 | $\alpha$ -Thujene            | 161 | o-Isopropenyltoluene                    |
| 24 | Ethyl Chloride                 | 70 | Heptane                     | 116 | o-Xylene                     | 162 | 2,5-Dimethylstyrene                     |
| 25 | 2-Methyl-2-butene              | 71 | 2-Butenal                   | 117 | $\alpha$ -Phellandrene       | 163 | 2-Methylbenzaldehyde                    |
| 26 | 2-Propenal                     | 72 | (Z)-2-butenal               | 118 | $\alpha$ -Pinene             | 164 | Phenylacetaldehyde                      |
| 27 | Propanal                       | 73 | 1,4-Difluorobenzene         | 119 | Heptanal                     | 165 | 1-Methyl-2-(2-propenyl)benzene          |
| 28 | 1,1,2-Trichloroethane          | 74 | 1,2-Dichloropropane         | 120 | Cumene                       | 166 | 2-Methylbenzofuran                      |
| 29 | Acetone                        | 75 | 2-Heptene                   | 121 | 2-Butoxyethanol              | 167 | 7-Methylbenzofuran                      |
| 30 | Carbon disulfide               | 76 | ethyl propionate            | 122 | 4-Methylnonane               | 168 | m-Cymene                                |
| 31 | 2-Propanol                     | 77 | 1,4-Hexadiene, 4-methyl     | 123 | 2-Methylnonane               | 169 | 3-Methylindole                          |
| 32 | (Z)-1,3-Pentadiene             | 78 | 3-Methyl-3-buten-2-one      | 124 | m-Bromofluorobenzene         | 170 | 1-Dodecene                              |
| 33 | Cyclopentadiene                | 79 | 2-Ethylfuran                | 125 | 2-Methyl-2-cyclopentenone    | 171 | Indene                                  |
| 34 | Methyl acetate                 | 80 | 4,4-Dimethyl-cyclopentene   | 126 | 3-Methylnonane               | 172 | 1-Methylindene                          |
| 35 | Cyclopentene                   | 81 | 2,5-Dimethylfuran           | 127 | Camphene                     | 173 | Terpinolene                             |
| 36 | Dichloromethane                | 82 | 1,3,5-Trioxane              | 128 | Propyl benzene               | 174 | 1,2-Dimethyl-4-ethylbenzene             |
| 37 | Cyclopentane                   | 83 | 1-Butanol                   | 129 | 1-Methyl-4-ethylbenzene      | 175 | (E)-decahydronaphthalene                |
| 38 | 2-Methylpentane                | 84 | Methylcyclohexane           | 130 | 1-Ethyl-3-methylbenzene      | 176 | 1,3,5-Trichlorobenzene                  |
| 39 | 3-Methylpentane                | 85 | Methacrylic acid            | 131 | Propenylbenzene              | 177 | Hexachloro-1,3-butadiene                |
| 40 | 1-Butene, 2,3-dimethyl         | 86 | Dimethyl disulfide          | 132 | Decane                       | 178 | 1,1a,6,6a-tetrahydrocyclopropa[a]indene |
| 41 | Acrylonitrile                  | 87 | Iso butylacetate            | 133 | Myrcene                      | 179 | 1,2-Dihydronaphthalene                  |
| 42 | 1-Hexene                       | 88 | 4-Methylheptane             | 134 | $\beta$ -Pinene              | 180 | Azulene                                 |
| 43 | Hexane                         | 89 | 2-Butenenitrile             | 135 | 1-Ethyl-2-methylbenzene      | 181 | Naphthalene                             |
| 44 | 2-Hexene                       | 90 | 4-Methylcyclohexene         | 136 | 1-Decene                     |     |                                         |
| 45 | 2,5-Dihydrofuran               | 91 | Toluene                     | 137 | 2,6-Dimethylnonane           |     |                                         |
| 46 | 2-Methylbutanal                | 92 | 2-Butyl acetate             | 138 | 1,2,4-Trimethylbenzene       |     |                                         |

Figure S1. Investigated compounds.
